# Supplementary material for: Development of a reliable assay to measure glypican-1 in plasma and serum reveals circulating glypican-1 as a novel prostate cancer biomarker
Source: PubMed Central journal article supplement (PMC5976470; doi:10.18632/oncotarget.25009), 2018-04-27
Supplement: oncotarget-09-22359-s001.pdf [file oncotarget-09-22359-s001.pdf]

## Development of a reliable assay to measure glypican-1 in plasma and serum reveals circulating glypican-1 as a novel prostate cancer biomarker

### SUPPLEMENTARY MATERIALS

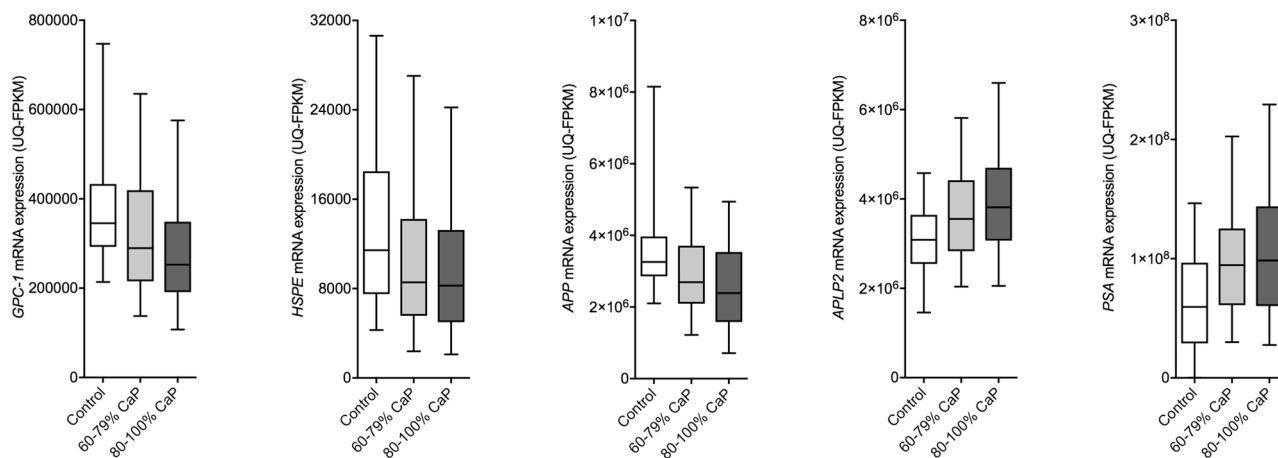

**Supplementary Figure 1: Transcriptional dysregulation in CaP.** Box-and-whisker plots (5<sup>th</sup>-95<sup>th</sup> percentile) of gene expression in non-cancerous prostate tissue (control, n = 52), primary prostate tumor tissue with 60-79% positively stained cancer nuclei (60-79% CaP, n = 286), and primary prostate tumor tissue with 80-100% positively stained cancer nuclei (80-100% CaP, n = 226). Normalized RNA-Seq expression data (UQ-FPKM) was downloaded from the NCI Genomic Data Commons data portal (<https://portal.gdc.cancer.gov/>, Data Release 4.0).
